# Supplementary material for: Comparative cytotoxicity and toxicological mechanisms of 6:2 Cl-PFAES and PFOS in pancreatic β cells: implications for glucose metabolism disruption
Source: Royal Society of Chemistry journal article supplement (doi:10.1039/d5em00046g), 2025-01-01
Supplement: d5em00046g1.pdf [file d5em00046g1.pdf]

## **Supplementary Material**

### **Comparative Cytotoxicity and Toxicological Mechanisms of 6:2 Cl-PFAES and PFOS on Pancreatic $\beta$ Cells: Implications for Glucose Metabolism Disruption**

Xiao-Min Ren<sup>1</sup>, Jianying Wang<sup>1</sup>, Fenqing Zhao<sup>1</sup>, Pingping Zhang<sup>1</sup>, Huan He<sup>1</sup>,  
Zhixiang Xu<sup>1</sup>, Bin Huang<sup>1</sup>, Xuejun Pan<sup>1\*</sup>

**Number of pages: 4**

**2 tables:**

**Table S1.** Differential gene expression statistics table

**Table S2.** The 11 Differentially expressed genes common to 6:2 Cl-PFAES and PFOS

**2 figures:**

**Fig S1.** Flow cytometry scatter plot of PFOS and 6:2 Cl PFAES induced apoptosis in  $\beta$ -TC-6 cells

**Fig S2.** Effects of 1% DMSO on  $\beta$ -TC-6 cell viability

**1 Description of Log2 (FoldChange) value**

**Table S1.** Differential gene expression statistics table

| DEG Group            | Up  | Down | Total |
|----------------------|-----|------|-------|
| PFOS vs Ctrl         | 76  | 7    | 83    |
| 6:2 Cl-PFAES vs Ctrl | 104 | 470  | 574   |

**Table S2.** The 11 Differentially expressed genes common to 6:2 Cl-PFAES and PFOS

| Gene Symbol   | Description                                                 |
|---------------|-------------------------------------------------------------|
| Txnip         | Thioredoxin Interacting Protein                             |
| Nts           | Neurotensin                                                 |
| Cav1          | Caveolin 1, Caveolae Protein                                |
| Il1rl1        | Interleukin 1 Receptor-Like 1                               |
| Myof          | Myoferlin                                                   |
| Serpinh1      | Serine (or cysteine) Peptidase Inhibitor, Clade H, Member 1 |
| S100a6        | S100 Calcium-Binding Protein A6 (calcyclin)                 |
| Adgr1         | Adhesion G Protein-Coupled Receptor A1                      |
| 9030612E09Rik | RIKEN cDNA 9030612E09 Gene                                  |
| Tgm2          | Transglutaminase 2, C Polypeptide                           |
| Ins15         | Insulin-Like 5                                              |

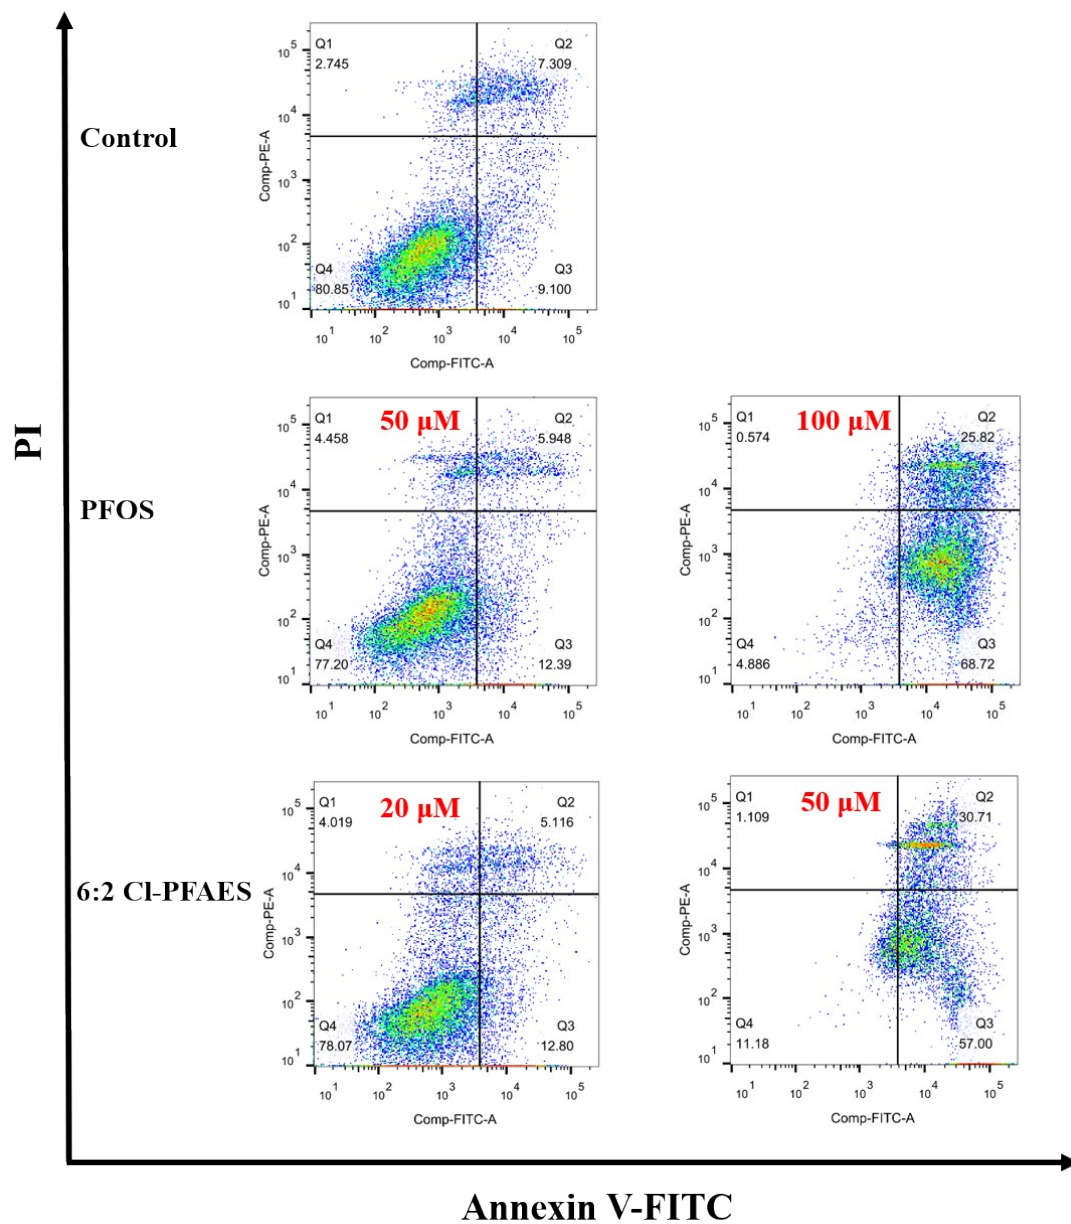

**Fig S1.** Flow cytometry scatter plot of PFOS and 6:2 Cl PFAES induced apoptosis in  $\beta$ -TC-6 cells.

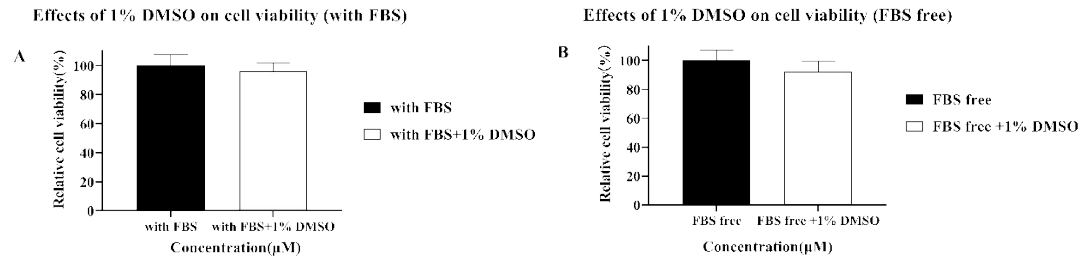

**Fig S2.** Effects of 1% DMSO on  $\beta$ -TC-6 cell viability. (A) CCK-8 assay results under normal exposure conditions (with 15% FBS); (B) CCK-8 assay results under FBS free exposure conditions.

## **Description of Log2 (FoldChange) value**

Log2 (FoldChange) represents the Log2 value of the fold change between two sample groups. In transcriptomics analysis (such as RNA-Seq), the log2(FoldChange) value is used to measure the degree of change in gene expression levels under different experimental conditions (e.g., control vs. treatment group).

$\text{Log2}(\text{FoldChange}) > 0$  indicates that the gene is upregulated in the experimental group (expression level increases). For example,  $\text{log2}(\text{FoldChange}) = 2$  means the gene expression in the experimental group is 4 times that of the control group.

$\text{Log2}(\text{FoldChange}) < 0$  indicates that the gene is downregulated in the experimental group (expression level decreases). For example,  $\text{log2}(\text{FoldChange}) = -1$  means the gene expression in the experimental group is 0.5 times (or half) that of the control group.

$\text{Log2}(\text{FoldChange}) = 0$  means there is no significant difference in gene expression between the two groups.
